# Supplementary material for: Preparation and characterization of novel alkali-resistant nanofiltration membranes with enhanced permeation and antifouling properties: the effects of functionalized graphene nanosheets
Source: Royal Society of Chemistry journal article supplement (doi:10.1039/c7ra00928c), 2017-01-01
Supplement: c7ra00928c1.pdf [file c7ra00928c1.pdf]

## Supporting Information

### Preparation and characterization of novel alkali-resistant nanofiltration membranes with enhanced permeation and antifouling properties: the effects of functionalized graphene nanosheets

Quanling Xie <sup>a,b,e</sup>, Shishen Zhang <sup>b,c</sup>, Zongyuan Xiao <sup>c</sup>, Xiangfeng Hu <sup>c</sup>, Zhuan Hong <sup>b,e</sup>, Ruizao Yi <sup>b,e</sup>, Wenyao Shao <sup>c,\*</sup>, Qiuquan Wang <sup>a,d,\*</sup>

<sup>a</sup> Department of Chemistry and the MOE Key Laboratory of Spectrochemical Analysis and Instrumentation, College of Chemistry and Chemical Engineering, Xiamen University, Xiamen 361005, China

<sup>b</sup> Engineering Research Center of Marine Biological Resource Comprehensive Utilization, SOA, The Third Institute of Oceanography of the State Oceanic Administration, Xiamen 361005, China

<sup>c</sup> Department of Chemical and Biochemical Engineering, College of Chemistry and Chemical Engineering, Xiamen University, Xiamen 361005, China

<sup>d</sup> State Key Laboratory of Marine Environmental Science, Xiamen University, Xiamen, 361005, China

<sup>e</sup> Fujian Collaborative Innovation Center for Exploitation and Utilization of Marine Biological Resources, Xiamen, 361005, China

#### S1. Compositions of the casting solutions.

Table S1. Compositions of the casting solutions

| Membrane    | PES (g) | SG (g) | GO (g) | PVP K30 (g) | NMP (g) | Acetone (g) |
|-------------|---------|--------|--------|-------------|---------|-------------|
| Blank       | 27.0    | 0      | 0      | 1.0         | 62.0    | 10.0        |
| PES-0.05-SG | 27.0    | 0.05   | 0      | 1.0         | 61.95   | 10.0        |
| PES-0.10-SG | 27.0    | 0.10   | 0      | 1.0         | 61.90   | 10.0        |
| PES-0.15-SG | 27.0    | 0.15   | 0      | 1.0         | 61.85   | 10.0        |
| PES-0.30-SG | 27.0    | 0.30   | 0      | 1.0         | 61.70   | 10.0        |
| PES-0.05-GO | 27.0    | 0      | 0.05   | 1.0         | 61.95   | 10.0        |
| PES-0.10-GO | 27.0    | 0      | 0.10   | 1.0         | 61.90   | 10.0        |
| PES-0.15-GO | 27.0    | 0      | 0.15   | 1.0         | 61.85   | 10.0        |
| PES-0.30-GO | 27.0    | 0      | 0.30   | 1.0         | 61.70   | 10.0        |

\* Corresponding author.

E-mail address: wyshao@xmu.edu.cn (W. Shao), qqwang@xmu.edu.cn (Q. Wang).

## S2. Elemental analysis of GO and SG.

Table S2. Elemental analysis of GO and SG

|    | C(%)  | H(%) | S(%) | O(%)  |
|----|-------|------|------|-------|
| GO | 48.41 | 2.65 | 0.86 | 48.08 |
| SG | 37.82 | 3.00 | 9.14 | 50.04 |

## S3. Color of membrane top surfaces.

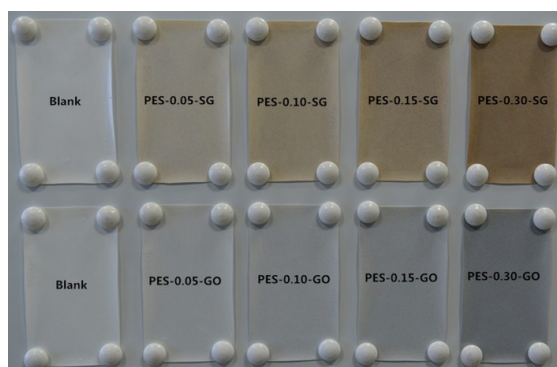

Fig. S1 Color change of membrane top surfaces

## S4. Viscosity of casting solutions.

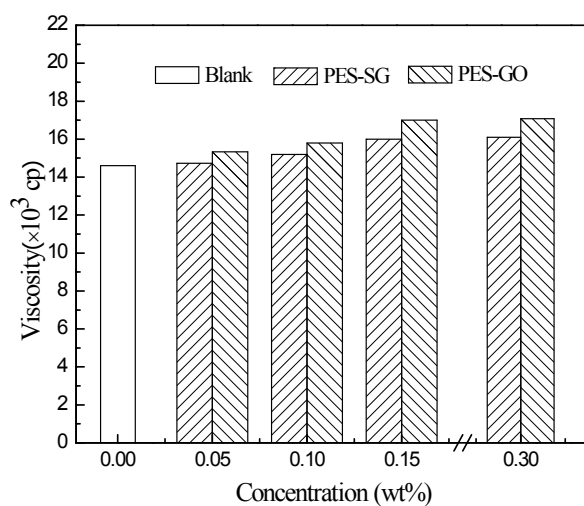

Fig. S2 Viscosity of casting solutions

## S5. Cross-sectional morphology of membranes.

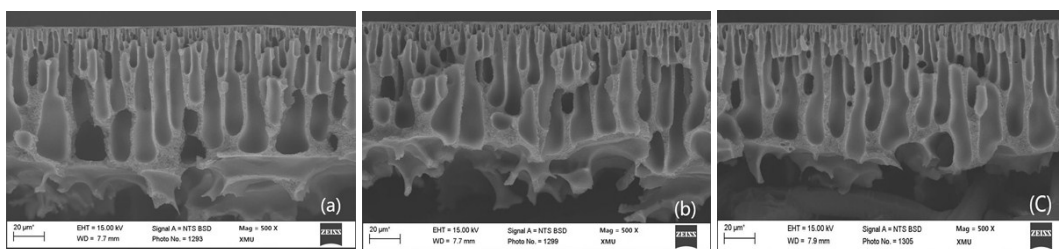

Fig. S3 Cross-sectional SEM images of PES-SG membranes with different SG concentrations: (a) 0 wt%, (b) 0.1 wt% (C) 0.3 wt%

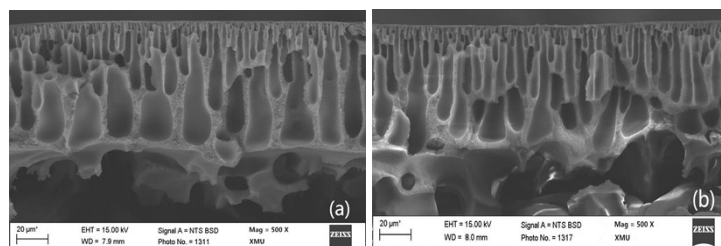

Fig. S4 Cross-sectional SEM images of PES-GO membranes with different GO concentrations: (a) 0.1 wt%, (b) 0.3 wt%.

### S6. Zeta potentials of functional graphenes.

The zeta-potentials of functional graphenes were evaluated by particle-size analyzer (Nano-Zetasizer 90, Malvern Instruments, UK). Before test, a measured concentration of functional graphenes were ultrasonicated in water bath for 1 h to obtain stable GO and SG suspension.

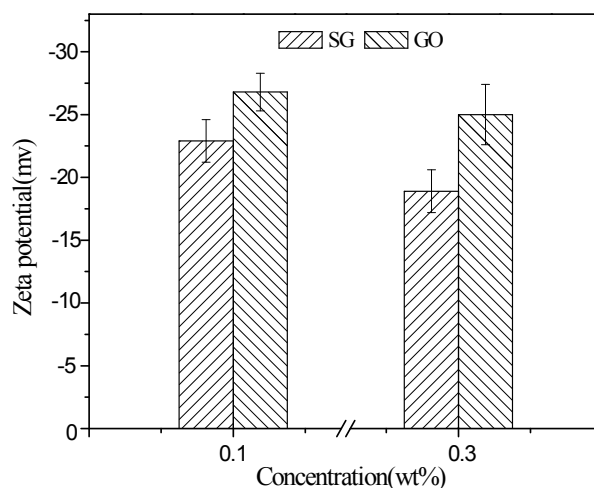

Fig. S5 Zeta potentials of functional graphene nanosheets
